# Supplementary material for: Sodium-ion battery using a NASICON-type Na3V2(PO4)3 cathode: quantification of diffusive and capacitive Na+ charge storage
Source: Royal Society of Chemistry journal article supplement (doi:10.1039/d4nj02108h), 2024-01-01
Supplement: d4nj02108h1.pdf [file d4nj02108h1.pdf]

## Sodium-ion Battery using NASICON-type $\text{Na}_3\text{V}_2(\text{PO}_4)_3$ Cathode: Quantification of Diffusive and Capacitive $\text{Na}^+$ Charge Storage

Sivasubramaniam Ragul, Annadoure Prabakaran, Elayaperumal Sujithkrishnan, Kalidoss Kannadasan and Perumal Elumalai\*

Electrochemical Energy Storage Lab, Department of Green Energy Technology,  
Madanjeet School of Green Energy Technologies, Pondicherry University,  
Puducherry-605014, India

### Supporting information

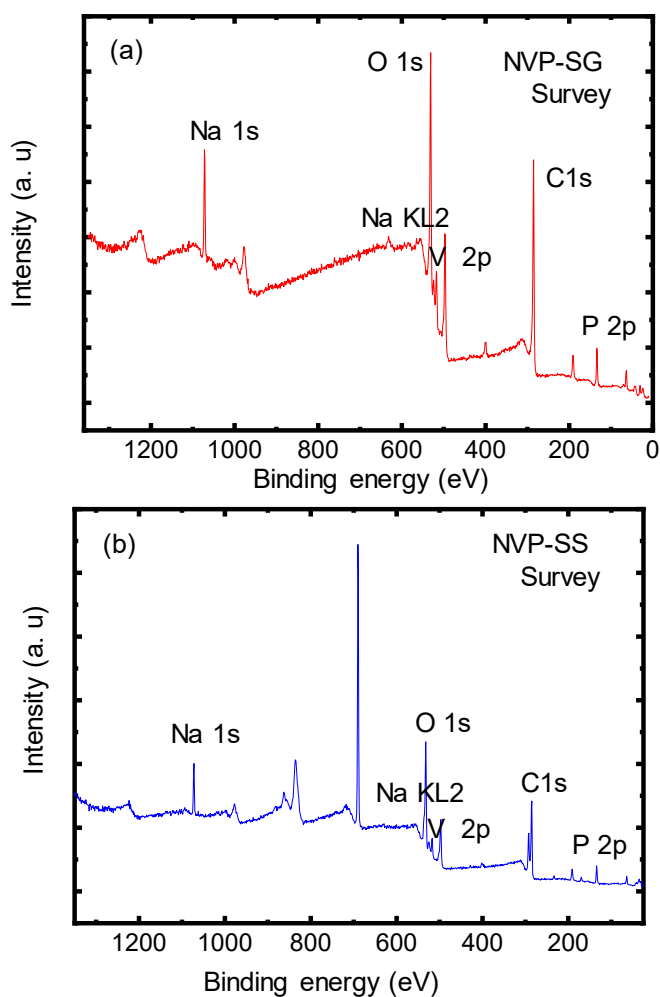

**Fig. S1.** XPS survey spectrum recorded for the NVP-SG and NVP-SS samples.
